# Supplementary material
Source: PubMed Central journal article supplement (PMC2430766)

**Supplemental Table 1. AbrB does not repress *sinI***

| Genotype <sup>a</sup> | <i>P<sub>sinI</sub>-lacZ</i> activity<br>(MU) <sup>b</sup> |
|-----------------------|------------------------------------------------------------|
| Wild type             | 5.8 ± 0.4                                                  |
| <i>epsH</i>           | 7 ± 2                                                      |
| <i>abrB epsH</i>      | 3.8 ± 0.1                                                  |

a. The following *P<sub>sinI</sub>-lacZ* containing strains were used FC149, FC321, FC346.

b. β-Galactosidase activity, calculated in Miller Units (MU), was measured from late-exponential phase cells grown in MSgg and is the average of at least three replicates.

**Table S2. Strains<sup>a</sup>**

| Strain | Genotype                                                                       |                     |
|--------|--------------------------------------------------------------------------------|---------------------|
| 3610   | Undomesticated wild strain                                                     |                     |
| FC13   | <i>ΔepsH::tet; amyE::P<sub>eps</sub>-lacZ</i> (cat)                            | Kearns et al., 2005 |
| FC14   | <i>ΔsinR::spec; ΔepsH::tet; amyE::P<sub>eps</sub>-lacZ</i> (cat)               | Kearns et al., 2005 |
| FC26   | <i>Δslr::tet</i>                                                               |                     |
| FC37   | <i>Δslr::tet; ΔsinR::spec</i>                                                  |                     |
| FC134  | <i>ΔepsH::tet; amyE::P<sub>yqxM</sub>-lacZ</i> (cat)                           | Chu et al., 2006    |
| FC135  | <i>ΔsinR::spec; ΔepsH::tet; amyE::P<sub>yqxM</sub>-lacZ</i> (cat)              | Chu et al., 2006    |
| FC149  | <i>amyE::P<sub>sinI</sub>-lacZ</i> (cat)                                       |                     |
| FC171  | <i>ΔsipW::tet</i>                                                              | Chu et al., 2006    |
| FC280  | <i>ΔabrB::kan</i>                                                              |                     |
| FC315  | <i>ΔyooA::tet</i>                                                              |                     |
| FC321  | <i>ΔepsH::tet; amyE::P<sub>sinI</sub>-lacZ</i> (cat)                           |                     |
| FC346  | <i>ΔepsH::tet; ΔabrB::kan; amyE::P<sub>sinI</sub>-lacZ</i> (cat)               |                     |
| FC413  | <i>Δspo0A::spec; amyE::P<sub>eps</sub>-lacZ</i> (cat)                          |                     |
| FC414  | <i>Δspo0A::spec; amyE::P<sub>yqxM</sub>-lacZ</i> (cat)                         |                     |
| FC415  | <i>ΔepsH::tet; ΔabrB::kan; amyE::P<sub>eps</sub>-lacZ</i> (cat)                |                     |
| FC416  | <i>ΔepsH::tet; ΔabrB::kan; amyE::P<sub>yqxM</sub>-lacZ</i> (cat)               |                     |
| FC444  | <i>ΔepsH::tet; Δspo0A::spec; ΔabrB::kan; amyE::P<sub>eps</sub>-lacZ</i> (cat)  |                     |
| FC445  | <i>ΔepsH::tet; Δspo0A::spec; ΔabrB::kan; amyE::P<sub>yqxM</sub>-lacZ</i> (cat) |                     |
| FC480  | <i>ΔepsH::tet; ΔsinR::spec; ΔabrB::kan; amyE::P<sub>eps</sub>-lacZ</i> (cat)   |                     |
| FC481  | <i>ΔepsH::tet; ΔsinR::spec; ΔabrB::kan; amyE::P<sub>yqxM</sub>-lacZ</i> (cat)  |                     |
| FC488  | <i>amyE::-112 P<sub>yqxM</sub>-lacZ</i> (cat)                                  |                     |
| FC495  | <i>amyE::-64 P<sub>yqxM</sub>-lacZ</i> (cat)                                   |                     |
| FC503  | <i>Δslr::tet; ΔabrB::kan</i>                                                   |                     |
| FC504  | <i>Δslr::tet; ΔabrB::kan; amyE::P<sub>yqxM</sub>-lacZ</i> (spec)               |                     |
| FC513  | <i>Δslr::tet; ΔabrB::kan; amyE::P<sub>eps</sub>-lacZ</i> (cat)                 |                     |

|        |                                                                                                                              |                  |
|--------|------------------------------------------------------------------------------------------------------------------------------|------------------|
| FC518  | <i>amyE::P<sub>slr</sub>-lacZ</i> (cat)                                                                                      |                  |
| FC519  | $\Delta$ <i>epsH::tet</i> ; <i>amyE::P<sub>slr</sub>-lacZ</i> (cat)                                                          |                  |
| FC520  | $\Delta$ <i>epsH::tet</i> ; $\Delta$ <i>sinR::spec</i> ; <i>amyE::P<sub>slr</sub>-lacZ</i> (cat)                             |                  |
| FC522  | $\Delta$ <i>epsH::tet</i> ; $\Delta$ <i>abrB::kan</i> ; <i>amyE::P<sub>slr</sub>-lacZ</i> (cat)                              |                  |
| FC525  | $\Delta$ <i>slr::mIs</i>                                                                                                     |                  |
| FC526  | $\Delta$ <i>epsH::tet</i> ; $\Delta$ <i>slr::mIs</i> ; <i>amyE::P<sub>eps</sub>-lacZ</i> (cat)                               |                  |
| FC527  | $\Delta$ <i>epsH::tet</i> ; $\Delta$ <i>sinR::spec</i> ; $\Delta$ <i>slr::mIs</i> ; <i>amyE::P<sub>eps</sub>-lacZ</i> (cat)  |                  |
| FC529  | $\Delta$ <i>epsH::tet</i> ; $\Delta$ <i>sinR::spec</i> ; $\Delta$ <i>slr::mIs</i> ; <i>amyE::P<sub>yqxM</sub>-lacZ</i> (cat) |                  |
| FC536  | $\Delta$ <i>slr::mIs</i> ; <i>amyE::P<sub>slr-slr</sub></i> (cat)                                                            |                  |
| FC591  | <i>amyE::P<sub>yqxM</sub>-lacZ</i> (cat)                                                                                     | Chu et al., 2006 |
| FC593  | $\Delta$ <i>slr::mIs</i> ; <i>amyE::P<sub>yqxM</sub>-lacZ</i> (cat)                                                          |                  |
| FC600  | $\Delta$ <i>slr::mIs</i> ; <i>yqxM</i> $\Omega$ P <sub>IPTG</sub> - <i>yqxM-sipW-tasA</i> (spec)                             |                  |
| ALM16  | <i>amyE::-100 P<sub>yqxM</sub>-lacZ</i> (cat)                                                                                |                  |
| ALM35  | <i>amyE::5'</i> site mutation P <sub><i>yqxM</i></sub> - <i>lacZ</i> (cat)                                                   |                  |
| ALM36  | <i>amyE::3'</i> site mutation P <sub><i>yqxM</i></sub> - <i>lacZ</i> (cat)                                                   |                  |
| ALM37  | <i>amyE::heptad repeat mutation P<sub>yqxM</sub>-lacZ</i> (cat)                                                              |                  |
| DS1674 | $\Delta$ <i>epsH::tet</i> ; $\Delta$ <i>sinR::kan</i>                                                                        |                  |

a. All strains are derivatives of 3610

**Table S3.** Primers<sup>a</sup>

| Primer    | Sequence (5' → 3')                                 |
|-----------|----------------------------------------------------|
| -499sinI  | tggcGAATTCagttttcactgacgtctcaaatatgt               |
| -2sinI    | gccaGGATCCagtttctctcctaaaatactgttta                |
| Slr1F     | tttgcattgatcatcgagaaaatgca                         |
| Slr2R     | caattcgcctatagtgagtcgtacggtagcaaacggataattcttcca   |
| Slr2_tetR | gaacaacctgcaccattgcaagaacggtagcaaacggataattcttcca  |
| Slr3F     | ccagcttttgtcccttttagtgagtgctgtccatgaagtcaaatcctt   |
| Slr3_tetF | ttgatcctttttataacaggaattctgtctgtccatgaagtcaaatcctt |
| Slr4R     | aattaatagcggaaataaccggaagca                        |
| slrcomp_F | cgcGGATCCgtattcatagccttcagcctt                     |
| slrcomp_R | ccgGAATTCaacgttagcccttaaccgatca                    |
| yoaW1_F   | agaacaagggcataagaatagaatca                         |
| yoaWP2_R  | caattcgcctatagtgagtcgttaaaagtaaacatcaacatcttttcaa  |
| yoaWP3_F  | ccagcttttgtcccttttagtgagacggtttcagtttgatcagccaga   |
| yoaW4_R   | ttgcgatgaaagtaggaattcatga                          |
| Pslr-F1   | gtcGAATTCtagacaatcgatataattctttg                   |
| Pslr-R1   | gtcGGATCCtagaaattctctctattctctgtg                  |
| +1slr     | gttcCATATGattggaagaattatccgttgtac                  |
| +339slr   | aggcCTCGAGgtaagaggcagtttcaggctgtt                  |
| -302yqxM  | tggcGAATTCatagacaaatcacacattgtttgatca              |
| -26yqxM   | gccaGGATCCatcttacctctgtaaaacactgtaa                |
| -175yqxM  | gttcGAATTCtagcaatactgagcaagactttgt                 |

|            |                                                      |
|------------|------------------------------------------------------|
| -160yqxM   | gttcGAATTCagcaagactttgtaatatgatga                    |
| -126yqxM   | gttcGAATTCaacgaacaaaatgagcgatttcggt                  |
| -270yqxM   | tggcGAATTCgtcaccctttctttgtttattattac                 |
| +14yqxM    | gccaGGATCCaacaatcgaaacatatcttacctcct                 |
| -21yqxM_R  | gccaGGATCCtgaacttgatgatgacaatcgttctc                 |
| -244yqxM_F | gttcGAATTCaccaaataataatgggatatgcatttaa               |
| ALM1       | gttcCTCGAG agactttgtaatatgatgaaaacattct              |
| ALM2       | gttcCTCGAGgtatgaagtgtttttcaattttttagaaattttggga      |
| ALM3       | gttcCTCGAGgtattgctcattttttcaattttttagaaatt           |
| ALM4       | gttcCTCGAGatactgagcaagactttgtaatatgat                |
| ALM5       | gttcCTCGAGttttttcaattttttagaaattttggga               |
| ECH318     | ggGGAATTCatatgtttatgaaatctactggtattgta               |
| ECH336     | accgCTCGAGtcatttaaggttttgaagctggttttggga             |
| ECH341     | aaactcactggcagcgatatcg                               |
| ECH342     | tctatttgttaagagccatatctaag                           |
| ECH343     | cggttatacaaggattcatcgagc                             |
| ECH344     | caattgtgcgccggtcacttcat                              |
| -246epsA   | gttcGAATTCtaatatgaaattctcctctattcctgt                |
| +4epsA     | gccaGGATCCtcatgtattcatagccttcagcctt                  |
| JSK362     | ggcAAGCTTacataaggaggaactactatgagtaaaggagaagaactttcac |
| JSK445     | ggcGGATCCtattttgatagttcatccatgccatg                  |

<sup>a</sup>Capital letters designate restriction enzyme sites added to the primers

### Supplementary Figure legends

**Figure S1. Effects of AbrB-regulated genes on biofilm formation.** ‘Colony’ column depicts 16 X images of colonies grown on MSgg semi-solid agar medium for 3 days at 22°C. Scale bar is 1 mm. ‘Pellicle’ column depicts top-down images of 6-well microtitre plates in which cells have been grown statically in MSgg medium for 3 days at 22°C. Scale bar is 1 cm. The indicated wild type and mutant strains were as follows: wild type (3610), *sipW* (FC171), and *yoaW* (FC315).

**Figure S2: Antibodies generated to SinR cross-react with Slr.** Western blot using  $\alpha$ -SinR as primary antibody. Whole cell lysates of the strains were loaded as follows: wild

type (3610); *slr* (FC26); *sinR slr* (FC37); *sinR* (DS1674). Lanes were loaded and normalized to 0.1 OD600 cell equivalents.

**Figure S3. A *sinR* mutation, but not an *abrB* mutation, is partially epistatic to the effects of an *slr* mutation.** A) ‘Colony’ column depicts 16 X images of colonies grown on MSgg semi-solid agar medium for 3 days at 22°C. Scale bar is 1 mm. ‘Pellicle’ column shows top-down images of 6-well microtitre plates in which cells have been grown statically in MSgg medium for 3 days at 22°C. Scale bar is 1 cm. The indicated wild type and mutant strains were as follows: wild type (3610), *sinR slr* (FC37), *abrB slr* (FC503). B,C) The indicated strains were grown at 30°C in MSgg and β-galactosidase was measured in Miller Units. B) β-galactosidase expression of  $P_{eps}$ -*lacZ* in wild type (◆)(FC13), *slr* (■) (FC526), *sinR* (▲)(FC14), *abrB* (□)(FC415), *sinR slr* (X)(FC527), *abrB slr* (○)(FC513). C) β-galactosidase expression of  $P_{yqxM}$ -*lacZ* in wild type (◆) (FC134), *slr* (■) (FC528), *sinR* (▲)(FC135), *abrB* (□)(FC416), *sinR slr* (X)(FC529), *abrB slr* (○)(FC504) .

**Figure S4. Slr is a DNA-binding protein.** EMSA in which radiolabeled DNA’s (denoted below each panel) were mixed with purified N-terminal Slr at the indicated concentrations. Sizes of the DNA fragments containing *gfp* and  $P_{yqxM}$ , were 741 and 284 base pairs, respectively. The horizontal arrow indicates the position of free probe.

Figure S1

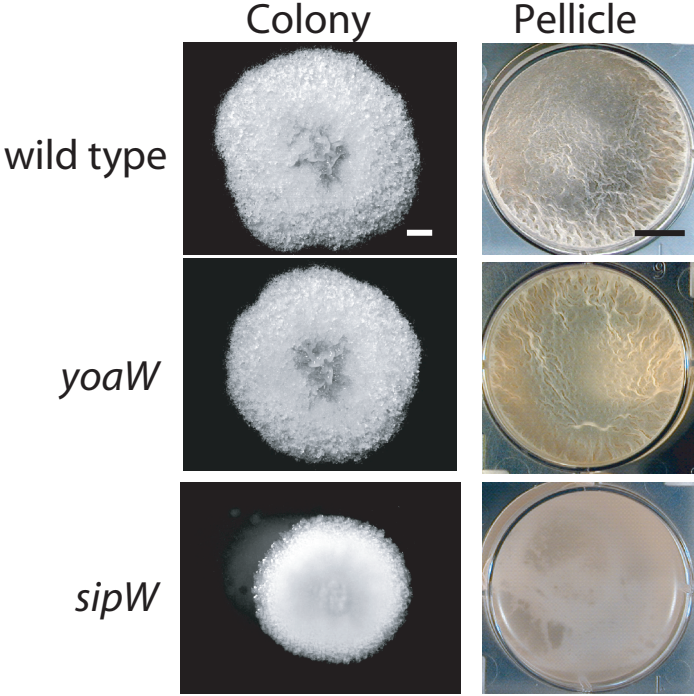

Figure S2

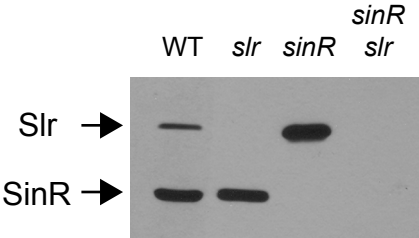

Figure S3

A

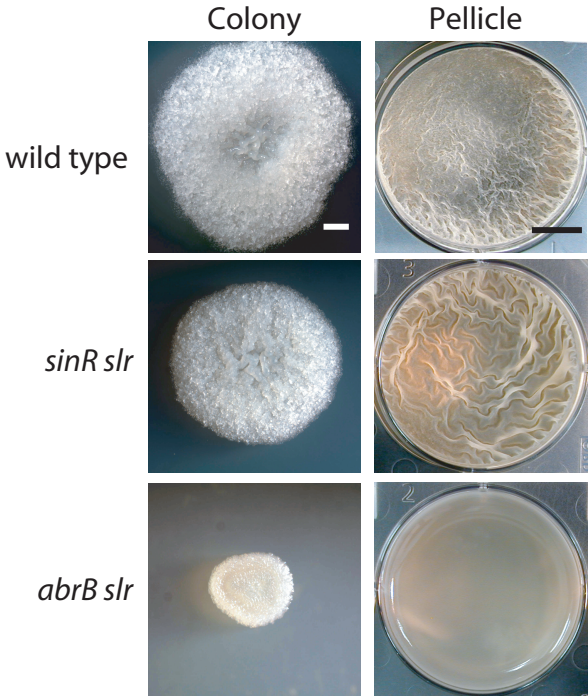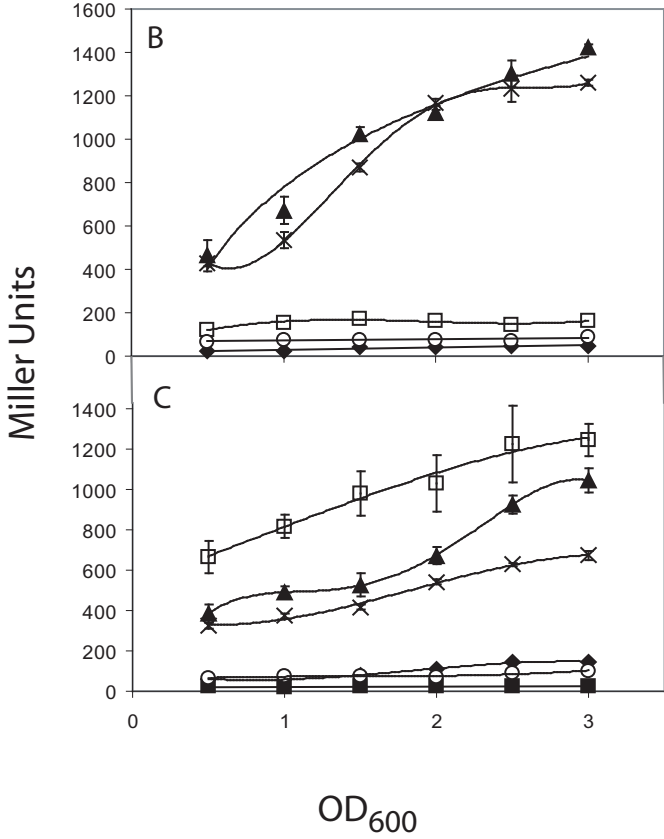

Figure S4

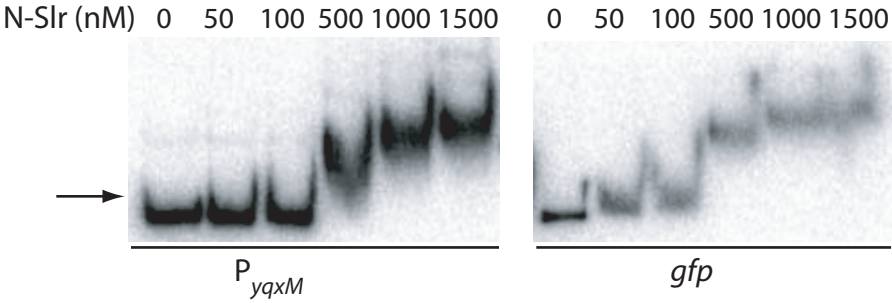

Supplement: NIHMS49720-supplement-supplemental.pdf [file NIHMS49720-supplement-supplemental.pdf]
